# Supplementary material
Source: Royal Society of Chemistry journal article supplement (doi:10.1039/d6dt01204c)
Supplement: d6dt01204c1.pdf [file d6dt01204c1.pdf]

Supporting Information

# Synergizing Ag Alloying and Urchin-Like Structure on Steering Formic Acid Oxidation Toward the Direct Pathway in Acidic Medium

Yuke Han,<sup>a†</sup> Haoyu Sun,<sup>b†</sup> Yongzheng Zhang,<sup>b\*</sup> Yanyun Ma,<sup>c</sup> Liaokuo Gong<sup>a\*</sup>, Yiqun Zheng<sup>ab\*</sup>

<sup>a</sup> School of Chemistry and Chemical Engineering, Qufu Normal University, Qufu, Shandong 273165, PR China

<sup>b</sup> School of Chemistry, Chemical Engineering, and Materials, Jining University, Qufu, Shandong 273155, China

<sup>c</sup> Institute of Functional Nano & Soft Materials (FUNSOM), Jiangsu Key Laboratory of Advanced Negative Carbon Technologies, Soochow University, Suzhou, Jiangsu 215123, P. R. China.

<sup>†</sup> These authors contribute equally to this work.

\*Corresponding authors: Prof. Dr. Y. Zheng, E-mail: yzheng@jnxy.edu.cn; Prof. Y. Zhang, E-mail: zyz8017@163.com; Prof. L. Gong, E-mail: liaokuogong@163.com.

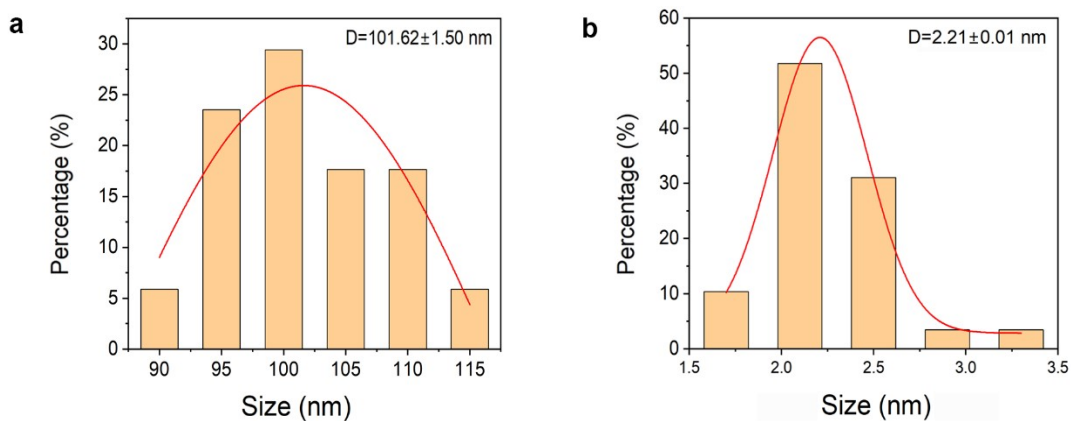

**Figure S1.** Size distribution histograms for (a) overall particles and (b) branches.

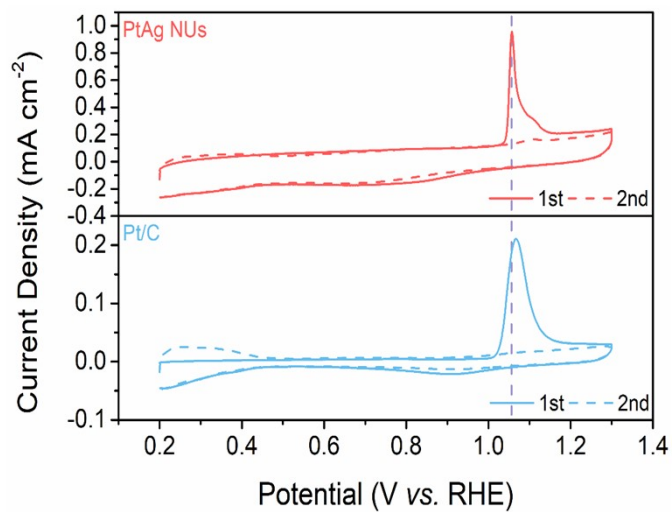

**Figure S2.** CO stripping voltammograms collected in 0.5 M  $\text{H}_2\text{SO}_4$  at a scan rate of  $50 \text{ mV s}^{-1}$ .

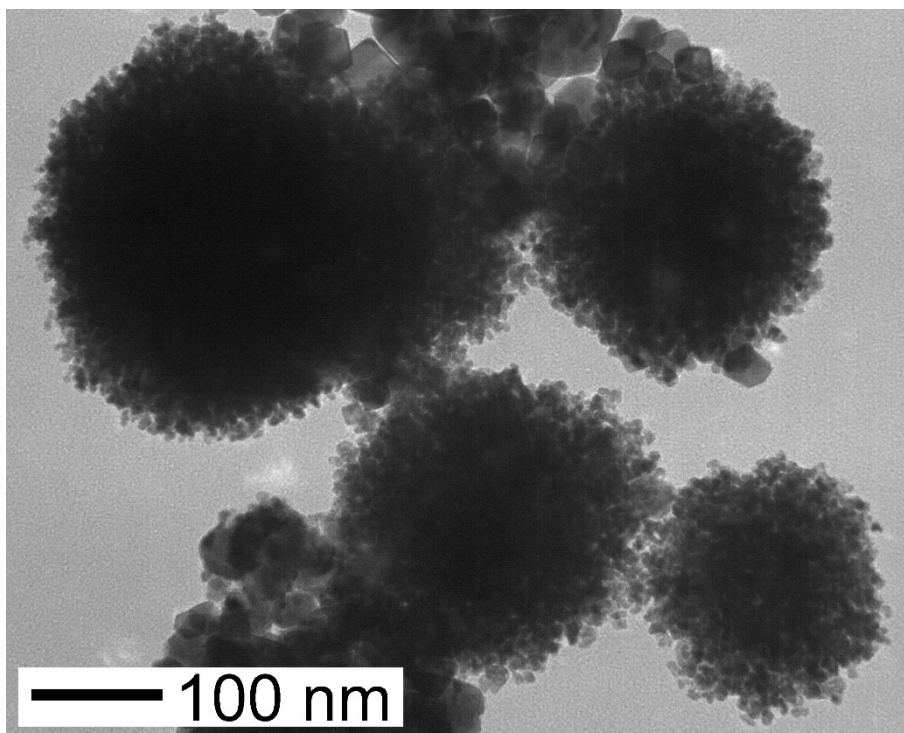

**Figure S3.** TEM image of PtAg NUs after the CA test.

**Table S1.** Summary of the relative peak area (%) for each split B.E. peak and the parameters used to fit the Ag(I), Ag(0), and Pt(II), Pt(0) high-resolution XPS spectra of PtAg NUs.

| <b>Element</b> | <b>B. E. Peak<br/>(eV)</b> | <b>FWHM<br/>(eV)</b> | <b>Peak Area<br/>(%)</b> | <b>Element<br/>/Oxidation state</b> |
|----------------|----------------------------|----------------------|--------------------------|-------------------------------------|
| Pt             | 70.5                       | 0.83                 | 25.59                    | Pt (0)                              |
|                | 71.0                       | 1.76                 | 27.90                    | Pt (II)                             |
|                | 73.9                       | 0.99                 | 26.14                    | Pt (0)                              |
|                | 74.5                       | 2.48                 | 20.38                    | Pt (II)                             |
| Ag             | 367.3                      | 1.00                 | 52.62                    | Ag (0)                              |
|                | 368.6                      | 0.92                 | 6.81                     | Ag (I)                              |
|                | 373.1                      | 0.84                 | 33.57                    | Ag (0)                              |
|                | 374.1                      | 0.92                 | 7.00                     | Ag (I)                              |

**Table S2.** XRD results and theoretical diffraction peak positions of as-prepared of PtAg NUs

(Pt:Ag=86.17:13.83)

| Sample/Element | Value Source       | Diffraction Peak Position (°) |       |       |       |
|----------------|--------------------|-------------------------------|-------|-------|-------|
|                |                    | (111)                         | (200) | (220) | (311) |
| PtAg NUs       | XRD                | 38.8                          | 45.1  | 65.8  | 79.4  |
|                | Theoretical*       | 39.2                          | 45.8  | 66.7  | 80.3  |
| Pt             | JCPDS No. 004-0802 | 39.5                          | 46.0  | 67.0  | 80.7  |
| Ag             | JCPDS No. 004-0783 | 38.2                          | 44.5  | 64.7  | 77.7  |

**Table S3.** Summary of FAOR performances of PtAg NUs/C electrocatalysts in the present study.

Data of commercial Pt/C was provided for comparison.

| Electrocatalyst | $E_s^{**}$<br>(mV) | $E_{p1}$<br>(mV) | $E_{p2}$<br>(mV) | ECSA<br>( $m^2 g^{-1}$ ) | $i_r/i_{f1}$ | $i_r/i_{f2}$ | $SA_1$<br>( $mA cm^{-2}$ ) | $SA_2$<br>( $mA cm^{-2}$ ) | $i$ (t=3600s)<br>( $mA cm^{-2}$ ) |
|-----------------|--------------------|------------------|------------------|--------------------------|--------------|--------------|----------------------------|----------------------------|-----------------------------------|
| PtAg NUs/C      | 320.0              | 682.9            | 1059.9           | 2.6                      | 1.35         | 1.78         | 0.88                       | 0.66                       | 0.035                             |
| Pt/C            | 430.0              | 715.1            | 1090.5           | 58.0                     | 8.0          | 2.35         | 0.05                       | 0.17                       | 0.006                             |

\*  $E_{p1}$  and  $E_{p2}$  correspond to the potentials of two pathways for formic acid oxidation catalyzed by the sample, respectively;  $i_r/i_{f1}$  and  $i_r/i_{f2}$  correspond to  $E_{p1}$  and  $E_{p2}$ , respectively;  $SA_1$  and  $SA_2$  correspond to  $E_{p1}$  and  $E_{p2}$ , respective

\*\*  $E_s$  corresponds to onset potential, which was determined using the linear extrapolation method. Specifically, the linear region of the rising current portion of the polarization curve was extrapolated to intersect with the baseline current region, and the potential at this intersection point was taken as the onset potential. This approach was consistently applied across all samples to ensure a standardized and objective comparison.

**Table S4.** Comparison of the specific activity of PtAg NUs/C with recently reported Pt-based and PtAg-based electrocatalysts for the formic acid oxidation reaction.

| <b>Electrocatalyst</b>                                                   | <b>SA<sub>1</sub></b> | <b>SA<sub>2</sub></b> | <b>SA<sub>1</sub>/SA<sub>2</sub></b> | <b>Enhancement factor</b> | <b>Ref.</b>  |
|--------------------------------------------------------------------------|-----------------------|-----------------------|--------------------------------------|---------------------------|--------------|
| PtAg NUs/C                                                               | 0.88                  | 0.66                  | 1.33                                 | 17.6                      | current work |
| Pt <sub>10</sub> %/Sb (Antimonene)                                       | 0.95                  | 0.12                  | 7.92                                 | 2.02                      | 1            |
| Pt <sub>20</sub> %/Sb (Antimonene)                                       | 2.15                  | 0.7                   | 3.07                                 | 4.57                      | 1            |
| Pt <sub>40</sub> %/Sb (Antimonene)                                       | 1.74                  | 0.57                  | 3.05                                 | 3.7                       | 1            |
| Pt-C <sub>3</sub> N <sub>4</sub> @CNT                                    | 0.79                  | 0.08                  | 9.88                                 | 2.55                      | 2            |
| PtNi/Nifoam                                                              | 0.62                  | 0.06                  | 10.33                                | 1.77                      | 3            |
| NiO <sub>x</sub> /Pt                                                     | 9                     | 1.2                   | 7.5                                  | 2                         | 4            |
| FeO <sub>x</sub> /NiO <sub>x</sub> /Pt                                   | 22                    | 2                     | 11                                   | 4.89                      | 4            |
| a-FeO <sub>x</sub> /NiO <sub>x</sub> /Pt                                 | 28                    | 1.7                   | 16.5                                 | 6.22                      | 4            |
| Pt Islands on 3D Nut-like PtAg Nanocrystals                              | 3.31                  | -                     | -                                    | 7.36                      | 5            |
| N-doped Graphene Supported Hollow PtAg Nanodendrites                     | 6.14                  | -                     | -                                    | 11.81                     | 6            |
| Pt <sub>1</sub> Co <sub>1</sub> Alloy/C                                  | 6.71                  | -                     | -                                    | 14.91                     | 7            |
| Pt <sub>2</sub> -PtTe <sub>2</sub> Heterojunction Nanosheet Assemblies/C | 8.4                   | -                     | -                                    | 18.67                     | 8            |

## References

- [1] Y. Zhang, M. Qiao, Y. Huang, Y. Zou, Z. Liu, L. Tao, Y. Li, C.-L. Dong and S. Wang, *Research*, 2020, **2020**.
- [2] C. Li, Z. Tang, L. Shi, Y. Li, Y. Ji, K. Zhang, Z. Yang and Y.-M. Yan, *Chemistry*, 2023, **5**, 1621-1633.
- [3] A. Nacys, D. Simkunaitė, A. Balciunaite, A. Zabielaite, D. Upskuvienė, R. Levinas, V. Jasulaitienė, V. Kovalevskij, B. Simkunaite-Stanyniene, L. Tamasauskaite-Tamasiunaite and E. Norkus, *Materials*, 2023, **16**, 6427.
- [4] B. A. Al-Qodami, H. H. Alalawy, S. Y. Sayed, I. M. Al-Akraa, N. K. Allam and A. M. Mohammad, *RSC Adv.*, 2022, **12**, 20395-20402.
- [5] H. Xu, P. Song, B. Yan, J. Wang, C. Wang, Y. Shiraishi, P. Yang and Y. Du, *ChemSusChem*, 2018, **11**, 1056-1062.
- [6] H. Xu, B. Yan, S. Li, J. Wang, C. Wang, J. Guo and Y. Du, *ACS Sustain. Chem. Eng.*, 2018, **6**, 609-617.
- [7] Z. Zheng, B. Liu, J. Qiu, S. Xu, Y. Wang, M. Zhang, K. Li, Z. Sun, Z. Li, Y. Wan, C. R. A. Catlow and K. Yan, *ACS Catal.*, 2024, **14**, 18333-18344.
- [8] C. Dong, B. Zhang, H. Song, S. Zhou, J. Ye, H.-G. Liao, L. Dong, X. Huang and L. Bu, *ACS Nano*, 2024, **18**, 10008-10018.
